# Supplementary material
Source: PubMed Central journal article supplement (PMC4110686)
Supplement: NIHMS59191-supplement-1.pdf [file NIHMS59191-supplement-1.pdf]

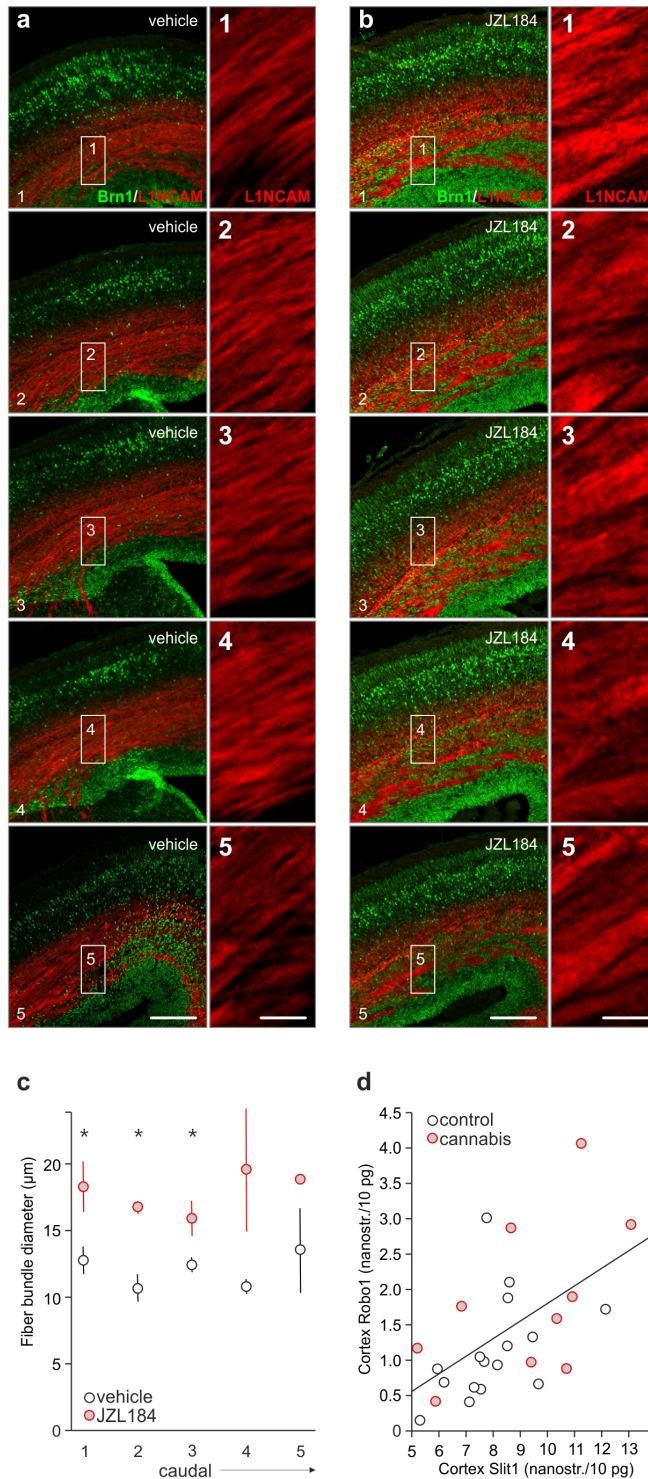

### Supplementary Figure 1 | JZL184 administration alters axon fasciculation.

(a,b) L1-NCAM<sup>+</sup> axons in the corpus callosum of JZL184- or vehicle-treated mouse fetuses at different rostral-caudal levels including the anterior commissure (1), the rostral pole of the hippocampus (5) and intermediate levels (2-4). (c) The diameter of axon fascicles in the corpus callosum, as shown for every corresponding coordinate (\**p* < 0.05). (d) Cortical Robo1 mRNA expression in cannabis-exposed human fetal subjects. Similarly for Slit1, there was a significant confound of development resulting in only a weak trend effect (*p* = 0.093) for the contribution of cannabis exposure. Data were expressed as means ± s.e.m., *n* = 4 – 6 mouse embryos/group; \**p* < 0.05 (Student's *t*-test). Scale bars = 200 µm (a,b), 10 µm (enumerated insets).

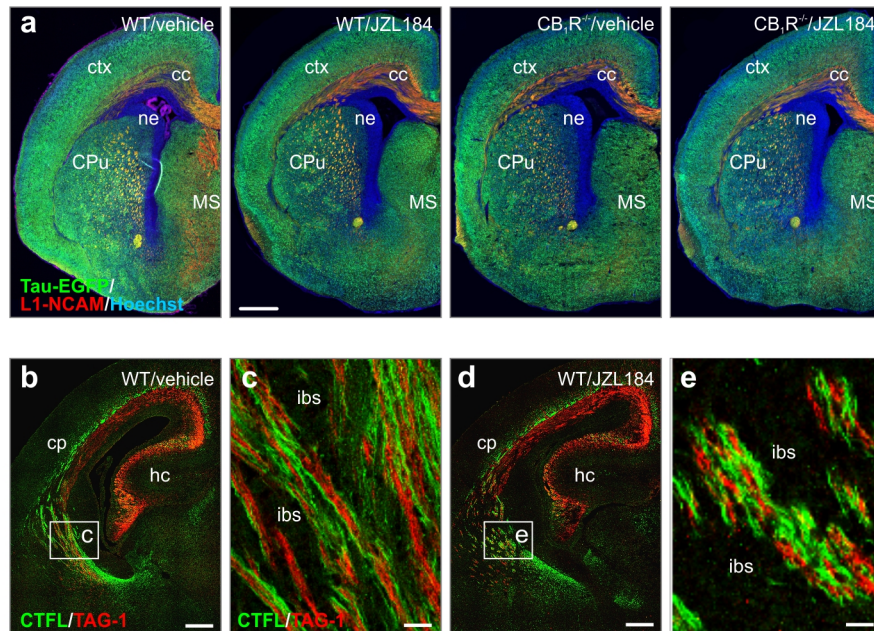

**Supplementary Figure 2 | The lack of CB<sub>1</sub>R<sub>s</sub> or exposure to JZL184 modulates axon fasciculation in the fetal brain.**

(a) Overview images showing enlarged callosal axon bundles in the absence of CB<sub>1</sub>R<sub>s</sub> in mice with GFP-tagged cytosolic tau ubiquitously expressed by cortical pyramidal neurons<sup>17</sup>. Note that subcortical neurons are also GFP-labeled. JZL184 did not alter the pattern of GFP expression. (b-e) JZL184 exposure during late gestation triggers coincident changes in CB<sub>1</sub>R<sup>+</sup> corticothalamic axons and CB<sub>1</sub>R<sup>-</sup> thalamocortical afferents<sup>18</sup> during their reciprocal pathfinding (termed as “handshake”)<sup>19</sup>. Note the increased inter-bundle space (ibs) amongst axon fascicles coursing at the pallio-subpallial boundary (c,e). TAG-1 is a neural cell adhesion molecule expressed in the corticofugal system<sup>16,20</sup>. CTFL (“C-terminal flanking epitope”) is a recently described pan-histochemical marker for thalamocortical axons<sup>14</sup>. Scale bars = 200 μm (a,b,d), 5 μm (c,e).

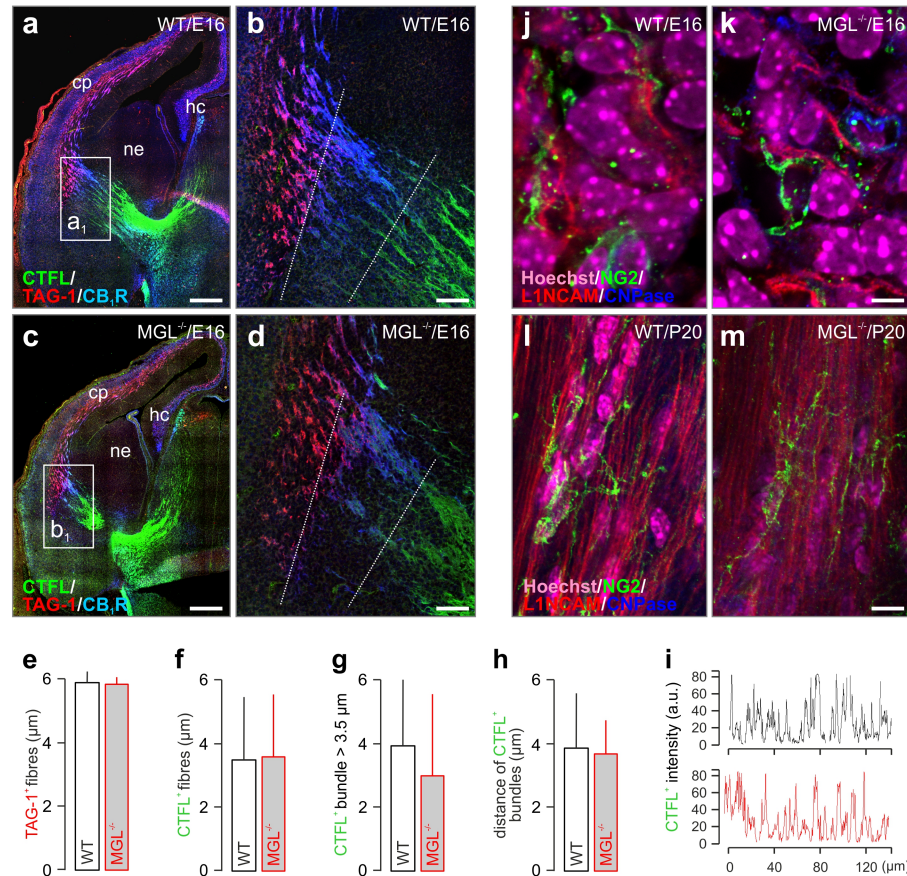

**Supplementary Figure 3 | Constitutive MGL<sup>-/-</sup> mice develop without axon fasciculation defects or premature oligodendroglioneogenesis.**

(a-d) The corticofugal system of MGL<sup>-/-</sup> embryos develops normally with no overt effect of MGL deletion on the fasciculation (e,f), distribution (g,h) or labeling intensity (i) of thalamocortical axons revealed by CTFL (“C-terminal flanking epitope”), a pan-histochemical marker of these afferents<sup>14</sup>. Fluorescence intensity plots (i) were calculated along the trajectories shown by dashed lines in (b) and (d). (j,k) Developmentally premature CNPase<sup>+</sup> or NG2<sup>+</sup> oligodendrocyte proliferation or overt oligodendrocyte accumulation in adulthood (l,m) were equally absent in MGL<sup>-/-</sup> mice, as compared to wild-type littermates. Data were expressed as means ± s.e.m.; n = 3-4/genotype. Scale bars = 200 µm (a,c), 15 µm (b,d), 5 µm (k,m).



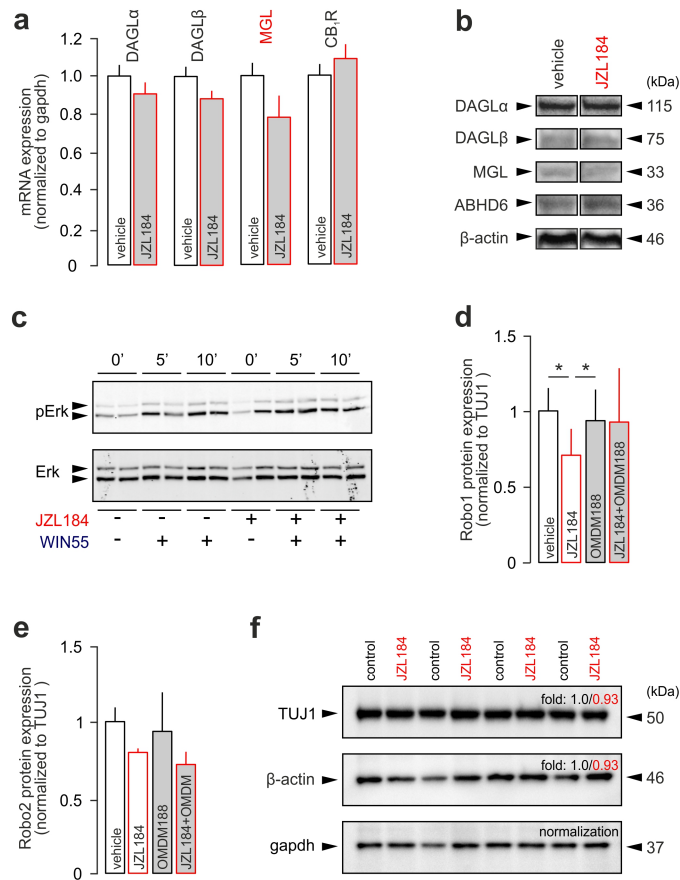

### Supplementary Figure 4 | Downstream effects of JZL184 *in vivo*.

(a) Maternal JZL184 treatment did not affect mRNAs of DAGL $\alpha$ , DAGL $\beta$ , MGL and CB $_1$ R in mouse embryonic cortices. (b) Western blot images showing protein expression levels of enzymes involved in 2-AG metabolism (quantitative analysis is shown in **Fig. 2s**). (c) Erk1/2 phosphorylation after acute WIN55,212-2 treatment of cultured cortical neurons in control or after exposure to JZL184 for 4 days. (d,e) Robo1 and Robo2 protein levels in cultured cortical neurons treated with JZL184 alone or in combination with the DAGL $\alpha$  inhibitor OMDM188<sup>21</sup>. Data were normalized to  $\beta$ -III-tubulin (TUJ1) as loading control. (f) Total amounts of the cytoskeletal markers TUJ1 and  $\beta$ -actin, normalized to glyceraldehyde-3-phosphate dehydrogenase (gapdh), upon exposure of cultured cortical neurons to JZL184 or vehicle. Data were expressed as means  $\pm$  s.e.m. Experiments were performed in triplicate with  $n \geq 2$  samples processed in parallel. \* $p < 0.05$  (Student's *t*-test).



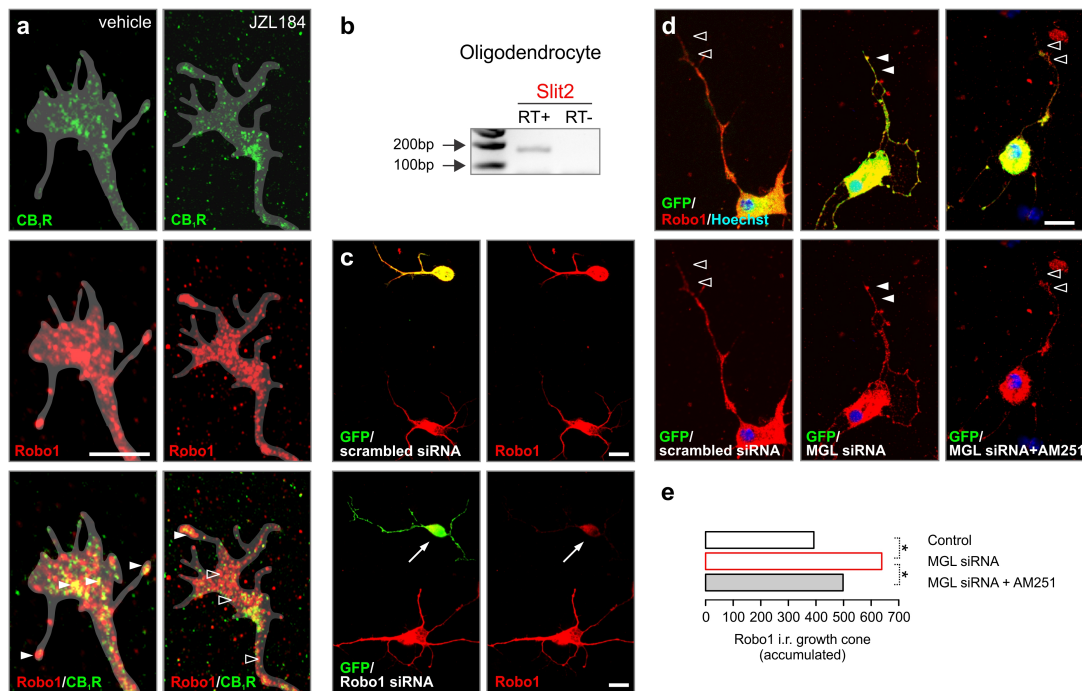

### Supplementary Figure 5 | Robo1 manipulation in cultured neurons.

(a) Co-localization of CB<sub>1</sub>R and Robo1 immunoreactivity in growth cones in vehicle and JZL184-treated mouse neurons. (b) Slit2 mRNA transcripts in cultured oligodendrocytes. (c) Robo1 immunoreactivity in neurons co-transfected with Robo1 siRNA and GFP relative to that in neurons co-transfected with scrambled siRNA and GFP. (d,e) Cortical primary neurons co-transfected with MGL siRNA showed increased Robo1 immunoreactivity within the growth cone. Data in (e) were expressed as means ± s.e.m.,  $n = 6-8/\text{group}$ ;  $*p < 0.05$  (Student's *t*-test). Scale bars = 20 μm (d), 10 μm (c), 3 μm (a).

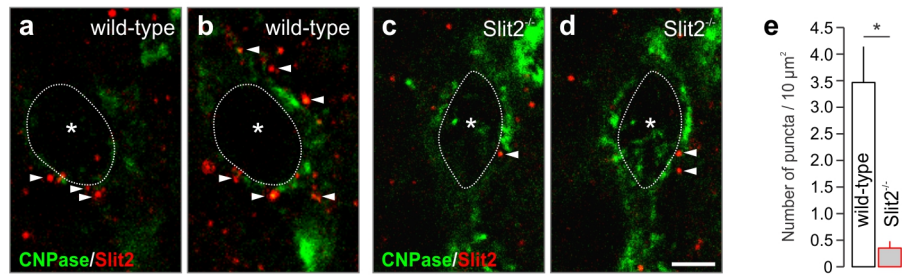

**Supplementary Figure 6 | Slit2 antibody validation in oligodendrocytes of Slit2<sup>-/-</sup> mice.**

(a-b) Slit2<sup>+</sup> puncta (*arrowheads*) associated with CNPase<sup>+</sup> oligodendrocyte somas (*asterisks*) and end-feet as imaged in 600 nm-thin serial optical sections. Genetic deletion of Slit2<sup>22</sup> abolished Slit2 immunoreactivity localized to oligodendrocytes (c-e). Data were expressed as means ± s.e.m.,  $n = 2$  animals/genotype;  $n \geq 5$  images/animal;  $*p < 0.05$  (Student's *t*-test). *Scale bars* = 10 μm (d).

Alpar *et al.* - Supplementary Figure 7

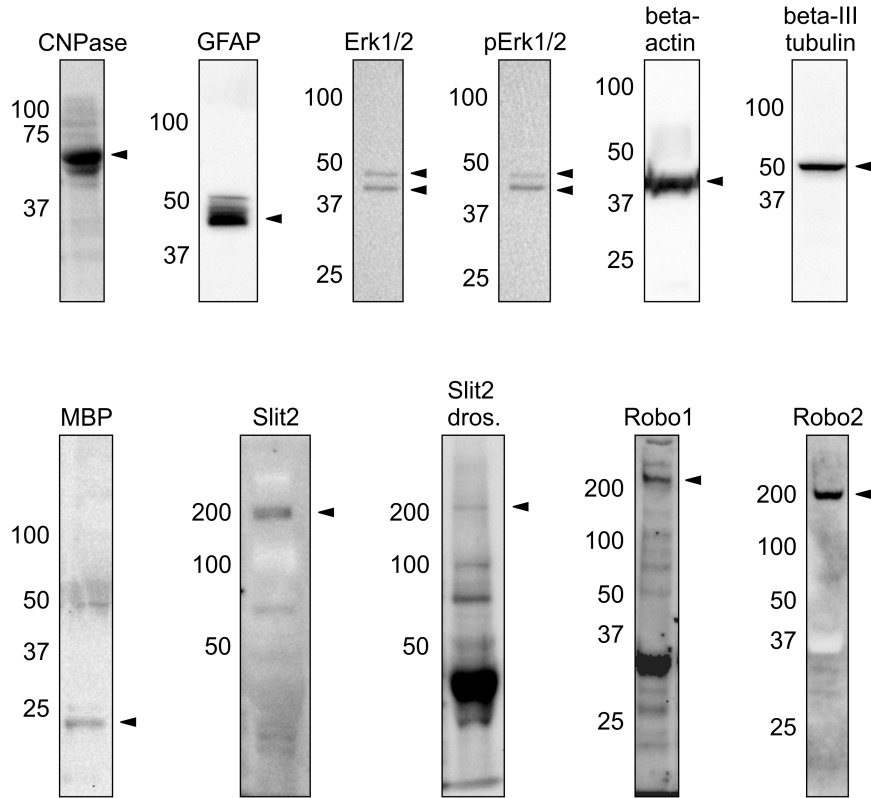

**Supplementary Figure 7** | [Staining profiles of antibodies used in this study.](#)

Full-length Western blotting staining profiles of antibodies used in this study.

Arrowheads point to bands of expected size. Molecular weight markers in kDa.



**Supplementary Table I** | List of markers used for immunofluorescence labeling.

Panel of antibodies used in this study. Staining methods and antibody specificities were described in detail elsewhere<sup>1-16</sup>.

*Abbreviations:* IH, immunohistochemistry; WB, Western blotting.

| Marker                    | Source              | Host                         | IH dilution                | WB dilution | Reference                          |
|---------------------------|---------------------|------------------------------|----------------------------|-------------|------------------------------------|
| Brn-1                     | Santa Cruz          | Goat, pc <sup>2</sup>        | 1:500                      | 1:50        | Keays <i>et al.</i> (2007)         |
| CB <sub>1</sub> R         | Dr. M. Watanabe     | Goat, pc <sup>2</sup>        | 1:1,000                    | n.a.        | Keimpema <i>et al.</i> (2013)      |
| CNPase                    | Sigma               | Mouse, mc <sup>1</sup>       | 1:500                      | 1:1,000     | Kasama-Yosida <i>et al.</i> (1997) |
| CTFL                      | Santa Cruz          | Rabbit, pc <sup>2</sup>      | 1:1,000                    | n.a.        | Wu <i>et al.</i> (2010)            |
| DAGL $\alpha$             | Dr. K. Mackie       | Rabbit, pc <sup>2</sup>      | 1:500                      | 1:500       | Mulder <i>et al.</i> (2011)        |
| DAGL $\beta$              | Dr. K. Mackie       | Rabbit, pc <sup>2</sup>      | 1:500                      | 1:500       | Mulder <i>et al.</i> (2011)        |
| GAP-43                    | Millipore           | Mouse, mc <sup>1</sup>       | n.a.                       | 1:1,000     | Benowitz & Routtenberg (1997)      |
| GFAP                      | Synaptic Systems    | Guinea Pig, pc <sup>2</sup>  | 1:800                      | 1:2,000     | Antonucci <i>et al.</i> (2012)     |
| L1-NCAM                   | Millipore           | Rat, pc <sup>2</sup>         | 1:2,000                    | n.a.        | Lopez-Bendito <i>et al.</i> (2006) |
| MBP                       | Boehringer Mannheim | Mouse, mc <sup>1</sup>       | n.a.                       | 1:1,000     | Bologa <i>et al.</i> (1986)        |
| MGL                       | Dr. K. Mackie       | Rabbit, pc <sup>2</sup>      | 1:500                      | 1:1,000     | Mulder <i>et al.</i> (2011)        |
| Neurocan                  | R&D Systems         | Sheep, oc <sup>2</sup>       | 1:20                       | n.a.        | Bekku & Oohashi (2010)             |
| NG2                       | Millipore           | Rabbit, pc <sup>2</sup>      | 1:200                      | n.a.        | Zhao <i>et al.</i> (2006)          |
| RC2                       | Millipore           | Mouse, mc (IgM) <sup>1</sup> | 1:250                      | n.a.        | Mulder <i>et al.</i> (2008)        |
| Robo1                     | Dr. F. Murakami     | Rabbit, pc <sup>2</sup>      | 2.5mg/ml                   | 10mg/ml     | Andrews <i>et al.</i> (2006)       |
| Robo2                     | Dr. F. Murakami     | Rabbit, pc <sup>2</sup>      | 8.3mg/ml                   | 15mg/ml     | Andrews <i>et al.</i> (2006)       |
| Slit (Drosophila, C555.6) | Hybridoma Bank      | Mouse, mc <sup>1</sup>       | n.a.                       | 1:100       | Rothberg <i>et al.</i> (1990)      |
| Slit2                     | Millipore           | Rabbit, pc <sup>2</sup>      | 1:200/1:1,000 <sup>3</sup> | 1:1,000     | Little <i>et al.</i> (2001)        |
| TAG-1                     | Hybridoma Bank      | Mouse IgM, mc <sup>1</sup>   | 1:150                      | n.a.        | Wolfer <i>et al.</i> (1994)        |
| $\beta$ -Actin            | Sigma               | Mouse, mc <sup>1</sup>       | n.a.                       | 1:10,000    | Mulder <i>et al.</i> (2011)        |
| $\beta$ -III-tubulin      | Promega             | Mouse, mc <sup>1</sup>       | n.a.                       | 1:2,000     | Keimpema <i>et al.</i> (2013)      |

<sup>1</sup>monoclonal antibody, <sup>2</sup>polyclonal antibody <sup>3</sup>*in vivo/in vitro* dilutions

**Supplementary Table II** | List of qPCR primers.

Quantitative PCR reactions were performed with primer pairs amplifying short fragments for each gene. Primer pairs were designed to efficiently anneal to homologous nucleotide sequences from mouse and rat.  $T_A$ , annealing temperature. Forward and reverse indicate primer orientation.

| GenBank Number | Protein       | Primer pair <sup>a</sup>                                                        | $T_A$ (°C) <sup>b</sup> | Localization       |
|----------------|---------------|---------------------------------------------------------------------------------|-------------------------|--------------------|
| NM_007726      | CB1R          | (forward) 5'-TCTTAGACGGCCTTGCAGAT-3'<br>(reverse) 5'-AGGGACTACCCCTGAAGGAA-3'    | 60                      | Exon2<br>Exon 2    |
| NM_198114      | DAGL $\alpha$ | (forward) 5'-TCATGGAGGGGCTCAATAAG-3'<br>(reverse) 5'-AGCCCTCCAGACTCATCTCA-3'    | 60                      | Exon 18<br>Exon 20 |
| NM_144915      | DAGL $\beta$  | (forward) 5'-GTGTGCTGTGGTGGATTGTC-3'<br>(reverse) 5'-TCTCATGCTGACACACACGA-3'    | 60                      | Exon 1/2<br>Exon 2 |
| NM_011844      | MGL           | (forward) 5'-CAGAGAGGGCCAACCTACTTTTC-3'<br>(reverse) 5'-ATGCGCCCAAGGTCATATTT-3' | 62                      | Exon 2/3<br>Exon 4 |
| NM_019413.2    | Robo1         | (forward) 5'-GTGATCCCCGATCTCAGAAA-3'<br>(reverse) 5'-GTTGCCAAGTGACCAGGATT-3'    | 60                      | Exon 14<br>Exon 15 |
| NM_175549.4    | Robo2         | (forward) 5'-GGAGTGGACCACAGACAGGT-3'<br>(reverse) 5'-CCCGAAGTCTGACGGTACAT-3'    | 60                      | Exon 13<br>Exon 14 |
| NM_015748.3    | Slit1         | (forward) 5'-TCACTGACCTGCAGAACTGG-3'<br>(reverse) 5'-ACCATCTGGTCGAAGGTGAC-3'    | 60                      | Exon 32<br>Exon 34 |
| NM_178804.3    | Slit2         | (forward) 5'-CGCTGCCTGTCAAACAATA-3'<br>(reverse) 5'-CGCACTTCACCACTTTTCTCA-3'    | 60                      | Exon 36<br>Exon 36 |
| NM_008084      | Gapdh         | (forward) 5'-AACTTTGGCATTGTGGAAGG-3'<br>(reverse) 5'-ACACATTGGGGGTAGGAACA-3'    | 60/62                   | Exon5<br>Exon7     |

<sup>a</sup>'forward' and 'reverse' indicate primer orientation

<sup>b</sup>annealing temperature

**Supplementary Table III** | List of human fetal tissues used for histochemistry.

Characteristics of human fetal tissues used in this study, including their gestational age (weeks + days), sex and cause of death.

| <b>Case</b> | <b>gestational age</b> | <b>sex</b> | <b>cause of death</b>                  |
|-------------|------------------------|------------|----------------------------------------|
| control 1   | 20 + 5                 | female     | preterm birth                          |
| control 2   | 21 + 2                 | male       | preterm premature rupture of membranes |
| control 3   | 22 + 5                 | male       | spontaneous abortion                   |



**Supplementary Table IV** | CodeSet information for Nanostring Elements.

ACTB: Actin, beta; heat shock protein 90 kDa  $\alpha$  (cytosolic), class B member 1; Robo1: roundabout, axon guidance receptor, homolog1; Slit1: slit homolog 1; TBP: TATA box-binding protein; HKG: housekeeping gene.

| Accession      | Gene ID  | Position  | Target Sequence                                                                                            | Flags | Tag  |
|----------------|----------|-----------|------------------------------------------------------------------------------------------------------------|-------|------|
| NM_001101.2    | ACTB     | 1011-1110 | TGCAGAAGGAGATCACTGCCCTGGCACCCAGCACAAATGAAGATCAAGATCA<br>TTGCTCCTCCTGAGCGCAAGTACTCCGTGTGGATCGGCGGCTCCATCCT  | HKG   | T008 |
| NM_007355.2    | HSP90ab1 | 1881-1990 | AGCCAATATGGAGCGGATCATGAAAGCCCAGGCACTTCGGGACA ACTCC<br>ACCATGGGCTATATGATGGCCAAAAGCACCTGGAGATCAACCCTGACCAC   | HKG   | T007 |
| NM_002941.2    | Robo1    | 6396-6495 | TGAACCACAAAAAAAAAAGGCTGGTGTTACCAAACCAA ACTTGTTTCATT<br>TAGATAATTTGAAAAAGTTCCATAGAAAAGGCGTG CAGTACTAAGGGAAC |       | T001 |
| NM_003061.2    | Slit1    | 6251-6350 | AAGAGGCCCTGAATATACGATTGCCTGCCACGTTGTCTTCTCTTCCATAC<br>ACAGTGAAAATGTAGAAAGATGGTTTGTGAGGCCAAACTGTGAATGGGC    |       | T003 |
| NM_001172085.1 | TBP      | 588-687   | ACAGTGAATCTTGGTTGTAAACTTGACCTAAAGACCATTGCACTTCGTGCC<br>CGAAACGCCGAATATAATCCCAAGCGGTTTGCTGCGGTAATCATGAGGA   | HKG   | T006 |

## SUPPLEMENTARY REFERENCES

1. Bologna, L., Aizenman, Y., Chiappelli, F., & de, V.J. Regulation of myelin basic protein in oligodendrocytes by a soluble neuronal factor. *J Neurosci. Res.* **15**, 521-528 (1986).
2. Rothberg, J.M., Jacobs, J.R., Goodman, C.S., & Artavanis-Tsakonas, S. slit: an extracellular protein necessary for development of midline glia and commissural axon pathways contains both EGF and LRR domains. *Genes Dev.* **4**, 2169-2187 (1990).
3. Benowitz, L.I. & Routtenberg, A. GAP-43: an intrinsic determinant of neuronal development and plasticity. *Trends Neurosci.* **20**, 84-91 (1997).
4. Kasama-Yoshida, H. *et al.* A comparative study of 2',3'-cyclic-nucleotide 3'-phosphodiesterase in vertebrates: cDNA cloning and amino acid sequences for chicken and bullfrog enzymes. *J Neurochem.* **69**, 1335-1342 (1997).
5. Little, M.H. *et al.* Dual trafficking of Slit3 to mitochondria and cell surface demonstrates novel localization for Slit protein. *Am. J. Physiol Cell Physiol* **281**, C486-C495 (2001).
6. Andrews, W. *et al.* Robo1 regulates the development of major axon tracts and interneuron migration in the forebrain. *Development* **133**, 2243-2252 (2006).
7. Keays, D.A. Neuronal migration: unraveling the molecular pathway with humans, mice, and a fungus. *Mamm. Genome* **18**, 425-430 (2007).
8. Zhao, L., Tian, D., Xia, M., Macklin, W.B., & Feng, Y. Rescuing qkV dysmyelination by a single isoform of the selective RNA-binding protein QKI. *J Neurosci.* **26**, 11278-11286 (2006).
9. Mulder, J. *et al.* Endocannabinoid signaling controls pyramidal cell specification and long-range axon patterning. *Proc. Natl. Acad. Sci. U. S. A* **105**, 8760-8765 (2008).
10. Mulder, J. *et al.* Molecular reorganization of endocannabinoid signalling in Alzheimer's disease. *Brain* **134**, 1041-1060 (2011).
11. Antonucci, F. *et al.* Cracking down on inhibition: selective removal of GABAergic interneurons from hippocampal networks. *J Neurosci.* **32**, 1989-2001 (2012).
12. Lopez-Bendito, G. *et al.* Tangential neuronal migration controls axon guidance: a role for neuregulin-1 in thalamocortical axon navigation. *Cell* **125**, 127-142 (2006).
13. Keimpema, E. *et al.* Nerve growth factor scales endocannabinoid signaling by regulating monoacylglycerol lipase turnover in developing cholinergic neurons. *Proc. Natl. Acad. Sci. U. S. A* **110**, 1935-1940 (2013).
14. Wu, C.S. *et al.* Requirement of cannabinoid CB(1) receptors in cortical pyramidal neurons for appropriate development of corticothalamic and thalamocortical projections. *Eur. J. Neurosci.* **32**, 693-706 (2010).
15. Bekku, Y. & Oohashi, T. Neurocan contributes to the molecular heterogeneity of the perinodal ECM. *Arch. Histol. Cytol.* **73**, 95-102 (2010).
16. Wolfer, D.P., Henehan-Beatty, A., Stoeckli, E.T., Sonderegger, P., & Lipp, H.P. Distribution of TAG-1/axonin-1 in fibre tracts and migratory streams of the developing mouse nervous system. *J. Comp Neurol.* **345**, 1-32 (1994).
17. Tucker, K.L., Meyer, M., & Barde, Y.A. Neurotrophins are required for nerve growth during development. *Nat. Neurosci.* **4**, 29-37 (2001).
18. Berghuis, P. *et al.* Hardwiring the brain: endocannabinoids shape neuronal connectivity. *Science* **316**, 1212-1216 (2007).
19. Molnar, Z. & Blakemore, C. How do thalamic axons find their way to the cortex? *Trends Neurosci.* **18**, 389-397 (1995).
20. Denaxa, M., Chan, C.H., Schachner, M., Parnavelas, J.G., & Karagogeos, D. The adhesion molecule TAG-1 mediates the migration of cortical interneurons from the ganglionic eminence along the corticofugal fiber system. *Development* **128**, 4635-4644 (2001).
21. Ortar, G. *et al.* Tetrahydrolipstatin analogues as modulators of endocannabinoid 2-arachidonoylglycerol metabolism. *J. Med. Chem.* **51**, 6970-6979 (2008).
22. Andrews, W. *et al.* The role of Slit-Robo signaling in the generation, migration and morphological differentiation of cortical interneurons. *Dev. Biol.* **313**, 648-658 (2008).
